# Supplementary material for: New CEACAM-targeting 2A3 single-domain antibody-based chimeric antigen receptor T-cells produce anticancer effects in vitro and in vivo
Source: Springer Nature journal article supplement (doi:10.1007/s00262-023-03602-4), 2024-01-27
Supplement: MOESM1 [file 26667104]

## Supplementary Tables

### Supplementary Table 1

**Supplementary Table 1.** List of antibodies used for flow cytometry. Antibodies were purchased from Biolegend (San Diego, CA, USA), GeneScript (Piscataway, NJ, USA), R&D Systems (Minneapolis, MN, USA), and Thermo Fisher Scientific (Waltham, MA, USA). Abbreviations: AF - alexa fluor, APC - allophycocyanin, FITC - fluorescein isothiocyanate, PE - phycoerythrin, n/a - not applicable.

| Marker                            | Fluorochrome | Clone      | Cat. no.   | Source                   |
|-----------------------------------|--------------|------------|------------|--------------------------|
| CD3 (human)                       | APC          | OKT3       | 317318     | Biolegend                |
| CD107a (LAMP-1) (human)           | PE           | eBioH4A3   | 12-1079-42 | Thermo Fisher Scientific |
| CEACAM1 (human)                   | PE           | 283340     | FAB2244P   | R&D Systems              |
| CEACAM3 (human)                   | Biotin       | n/a        | BAF4166    | R&D Systems              |
| CEACAM5 (human)                   | AF 488       | 487609     | FAB41281G  | R&D Systems              |
| CEACAM5 (human)                   | AF 647       | 487609     | FAB41281R  | R&D Systems              |
| CEACAM6 (human)                   | PE           | KOR-SA3544 | 12-0667-42 | Thermo Fisher Scientific |
| CEACAM7 (human)                   | AF 488       | 962703     | FAB44781G  | R&D Systems              |
| camelid V <sub>H</sub> H Cocktail | FITC         | n/a        | A02017     | GeneScript               |
| Streptavidin                      | FITC         | n/a        | 11-4317-87 | Thermo Fisher Scientific |
| rabbit IgG control                | FITC         | 37C2       | A02024     | GeneScript               |
| Mouse IgG1                        | AF 488       | 11711      | IC002G     | R&D Systems              |
| Mouse IgG2A Isotype Control       | AF 647       | 20102      | IC003R     | R&D Systems              |
| mouse IgG1 kappa Isotype Control  | PE           | P3.6.2.8.1 | 12-4714-42 | Thermo Fisher Scientific |

### Supplementary Table 2

**Supplementary Table 2.** Information from statistical analysis of RTCA experiment data for pancreatic and breast cancer cell lines. Analysis was performed for timepoint of 20 h after beginning the co-culture, using t-test according to Hanidi et. Al (2017) Bio Protoc. 7(24): e2646 (doi: [10.21769/BioProtoc.2646](https://doi.org/10.21769/BioProtoc.2646)). All t-tests were done as paired one-tailed on groups of 4 repetitions. \*\*\* p<0.001, \*\* p<0.01, \* p<0.05

| BxPC3           |               |               |               |               |
|-----------------|---------------|---------------|---------------|---------------|
| CAR T-cells vs. | alone         | T-cells (NV)  | mock T-cells  | Triton X-100  |
| P value         | 0.0004        | 0.0113        | 0.0032        | 0.0154        |
| P value summary | ***           | *             | **            | *             |
| t, df           | t=14.06, df=3 | t=4.341, df=3 | t=6.864, df=3 | t=3.858, df=3 |
| Capan-1         |               |               |               |               |
| CAR T-cells vs. | alone         | T-cells (NV)  | mock T-cells  | Triton X-100  |
| P value         | 0.002         | 0.0175        | 0.0185        | 0.0412        |
| P value summary | **            | *             | *             | *             |
| t, df           | t=7.989, df=3 | t=3.673, df=3 | t=3.593, df=3 | t=2.572, df=3 |
| MIA PaCa-2      |               |               |               |               |
| CAR T-cells vs. | alone         | T-cells (NV)  | mock T-cells  | Triton X-100  |
| P value         | 0.0176        | 0.0125        | 0.014         | 0.0253        |
| P value summary | *             | *             | *             | *             |

| t, df           | t=3.665, df=3 | t=4.174, df=3  | t=3.999, df=3 | t=3.165, df=3 |
|-----------------|---------------|----------------|---------------|---------------|
| MCF-7           |               |                |               |               |
| CAR T-cells vs. | alone         | T-cells (NV)   | mock T-cells  | Triton X-100  |
| P value         | 0.0008        | 0.0001         | 0.0001        | 0.0363        |
| P value summary | ***           | ***            | ***           | *             |
| t, df           | t=10.98, df=3 | t=19.70, df=3  | t=19.56, df=3 | t=2.719, df=3 |
| SK-BR-3         |               |                |               |               |
| CAR T-cells vs. | alone         | T-cells (NV)   | mock T-cells  | Triton X-100  |
| P value         | 0.0002        | 0.0088         | 0.0059        | 0.0106        |
| P value summary | ***           | **             | **            | *             |
| t, df           | t=17.49, df=3 | t=4.764, df=3  | t=5.502, df=3 | t=4.443, df=3 |
| MDA-MB-231      |               |                |               |               |
| CAR T-cells vs. | alone         | T-cells (NV)   | mock T-cells  | Triton X-100  |
| P value         | 0.0145        | 0.4449         | 0.1306        | 0.0015        |
| P value summary | *             | ns             | ns            | **            |
| t, df           | t=3.952, df=3 | t=0.1506, df=3 | t=1.381, df=3 | t=8.922, df=3 |

### Supplementary Table 3

**Supplementary Table 3.** Information from statistical analysis of RTCA experiment data for MCF7 knock-out cell lines. Analysis was performed for timepoint of 24 h after beginning the co-culture, using t-test according to Hanidi et. Al (2017) Bio Protoc. 7(24): e2646 (doi: [10.21769/BioProtoc.2646](https://doi.org/10.21769/BioProtoc.2646)). All t-tests were done as paired one-tailed on groups of 2 repetitions.

| MCF7 CEACAM5-knock-out              |               |               |               |                |
|-------------------------------------|---------------|---------------|---------------|----------------|
| CAR T-cells vs.                     | alone         | T-cells (NV)  | mock T-cells  | Triton X-100   |
| P value                             | 0.105         | 0.1194        | 0.1803        | 0.2657         |
| P value summary                     | ns            | ns            | ns            | ns             |
| Significantly different (P < 0.05)? | No            | No            | No            | No             |
| One- or two-tailed P value?         | One-tailed    | One-tailed    | One-tailed    | One-tailed     |
| t, df                               | t=2.919, df=1 | t=2.539, df=1 | t=1.573, df=1 | t=0.9060, df=1 |
| Number of pairs                     | 2             | 2             | 2             | 2              |
| MCF7 CEACAM6-knock-out              |               |               |               |                |
| CAR T-cells vs.                     | alone         | T-cells (NV)  | mock T-cells  | Triton X-100   |
| P value                             | 0.107         | 0.1801        | 0.1958        | 0.2637         |
| P value summary                     | ns            | ns            | ns            | ns             |
| Significantly different (P < 0.05)? | No            | No            | No            | No             |
| One- or two-tailed P value?         | One-tailed    | One-tailed    | One-tailed    | One-tailed     |
| t, df                               | t=2.861, df=1 | t=1.575, df=1 | t=1.415, df=1 | t=0.9174, df=1 |
| Number of pairs                     | 2             | 2             | 2             | 2              |

**Supplementary Table 4**

**Supplementary Table 4.** Information from statistical analysis of RTCA experiment data for MDA-MB-231 cell lines with overexpression of CEACAM5 and CEACAM6 and control cell line. Analysis was performed for timepoint of 24 h after beginning the co-culture, using t-test according to Hanidi et. Al (2017) Bio Protoc. 7(24): e2646 (doi: [10.21769/BioProtoc.2646](https://doi.org/10.21769/BioProtoc.2646)). All t-tests were done as paired, one-tailed on groups of 3 repetitions. \*\* p<0.01, \* p<0.05

| MDA-MB-231 CEACAM5ox |               |               |               |               |
|----------------------|---------------|---------------|---------------|---------------|
| CAR T-cells vs.      | alone         | T-cells (NV)  | mock T-cells  | Triton X-100  |
| P value              | 0.0039        | 0.0289        | 0.0333        | 0.0151        |
| P value summary      | **            | *             | *             | *             |
| t, df                | t=11.19, df=2 | t=3.978, df=2 | t=3.676, df=2 | t=5.618, df=2 |
| MDA-MB-231 CEACAM6ox |               |               |               |               |
| CAR T-cells vs.      | alone         | T-cells (NV)  | mock T-cells  | Triton X-100  |
| P value              | 0.0155        | 0.0035        | 0.0127        | 0.0462        |
| P value summary      | *             | **            | *             | *             |
| t, df                | t=5.538, df=2 | t=11.88, df=2 | t=6.161, df=2 | t=3.057, df=2 |
| MDA-MB-231 control   |               |               |               |               |
| CAR T-cells vs.      | alone         | T-cells (NV)  | mock T-cells  | Triton X-100  |
| P value              | 0.0024        | 0.058         | 0.0313        | 0.0042        |
| P value summary      | **            | ns            | *             | **            |
| t, df                | t=14.47, df=2 | t=2.675, df=2 | t=3.806, df=2 | t=10.82, df=2 |

## Supplementary Figures

### Supplementary Figure S1

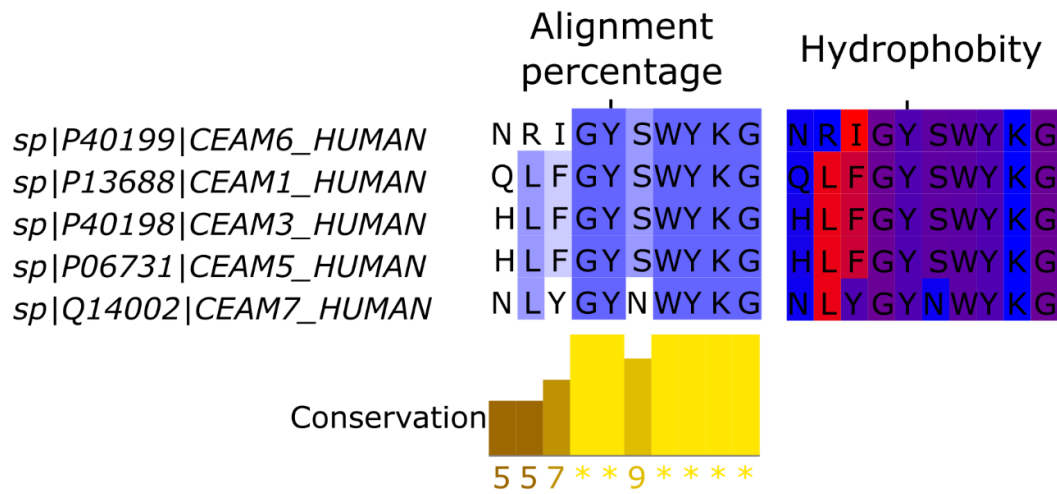

**Supplementary Figure S1.** Data from sequence alignment of the epitope sequence from CEACAM6, -1, -3, -5 and -7 presented in Jalview. Intensity of blue background of letters corresponds to the percentage of similarity of amino acids in the sequence. Hydrophobicity of amino acids is presented in red to blue scale, where red is most hydrophobic residue and blue is most hydrophilic residue.

### Supplementary Figure S2

```

1 QVKLEESGGG LVQAGGSLRL SCRTSGRTNS VYTMGWFRQA PGKEREVFAQ IMWGAGTNTH
61 YADSVKGRFT ISRDSAESTV YLQMNSLKPE DTAVYYCAAN RGIPIAGRQY DYWGQGTQVT
121 VSS

```

**Supplementary Figure S2.** Amino acid sequence of 2A3 sdAb, according to (Baral TN et al. (2011) J Immunol Methods. 371: 70-80. doi: 10.1016/j.jim.2011.06.017).

**Supplementary Figure S3**

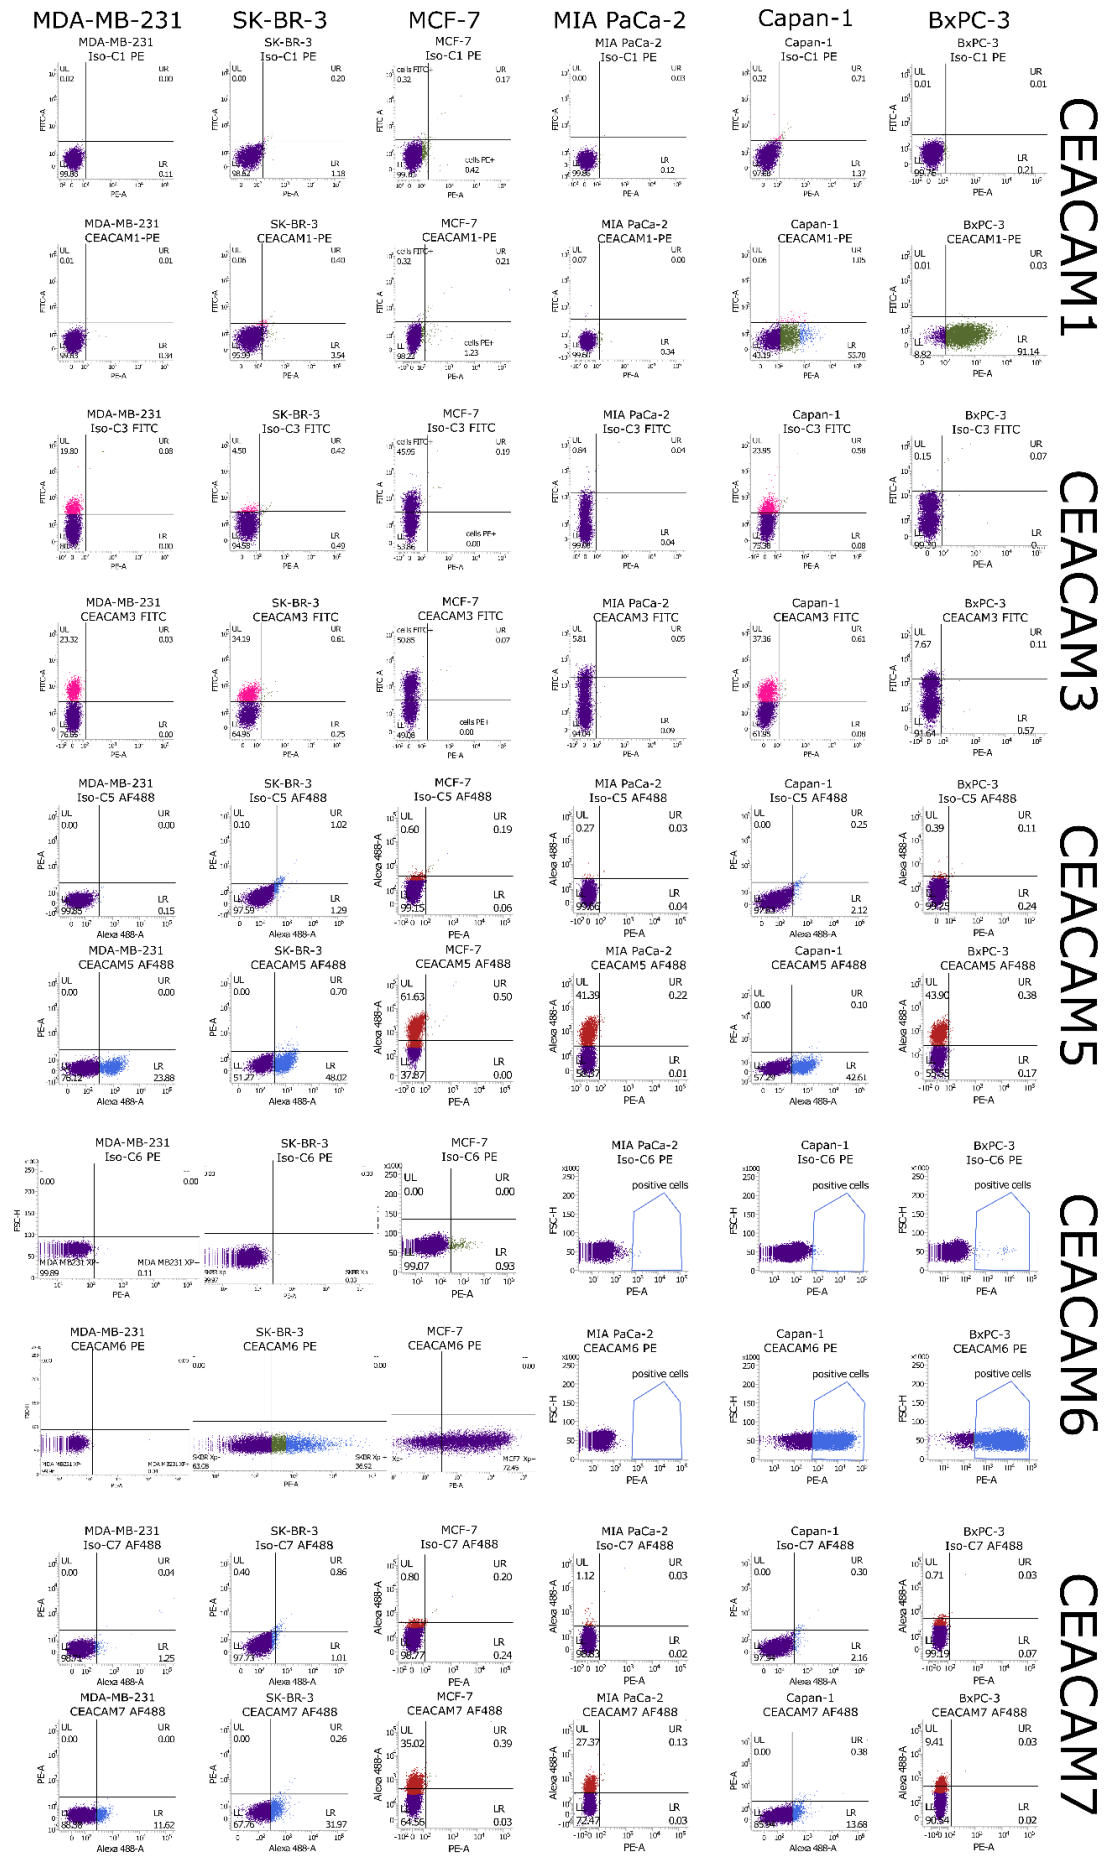

**Supplementary Figure S3.** The dot plots for the expression of each antigen by each cell line in regard to isotype control. Cell lines were stained with CEACAM1 (human) PE (283340, R&D Systems), CEACAM3 (human) Biotin (BAF4166, R&D Systems), Streptavidin FITC (11-4317-87, Thermo Fisher Scientific), CEACAM5 (human) AF488 (FAB41281G, R&D Systems), CEACAM6 (human) PE (12-0667-42, Thermo Fisher Scientific), CEACAM7 (human) AF488 (FAB44781G, R&D Systems). *Iso* – isotype control for the antibody.

**Supplementary Figure S4**

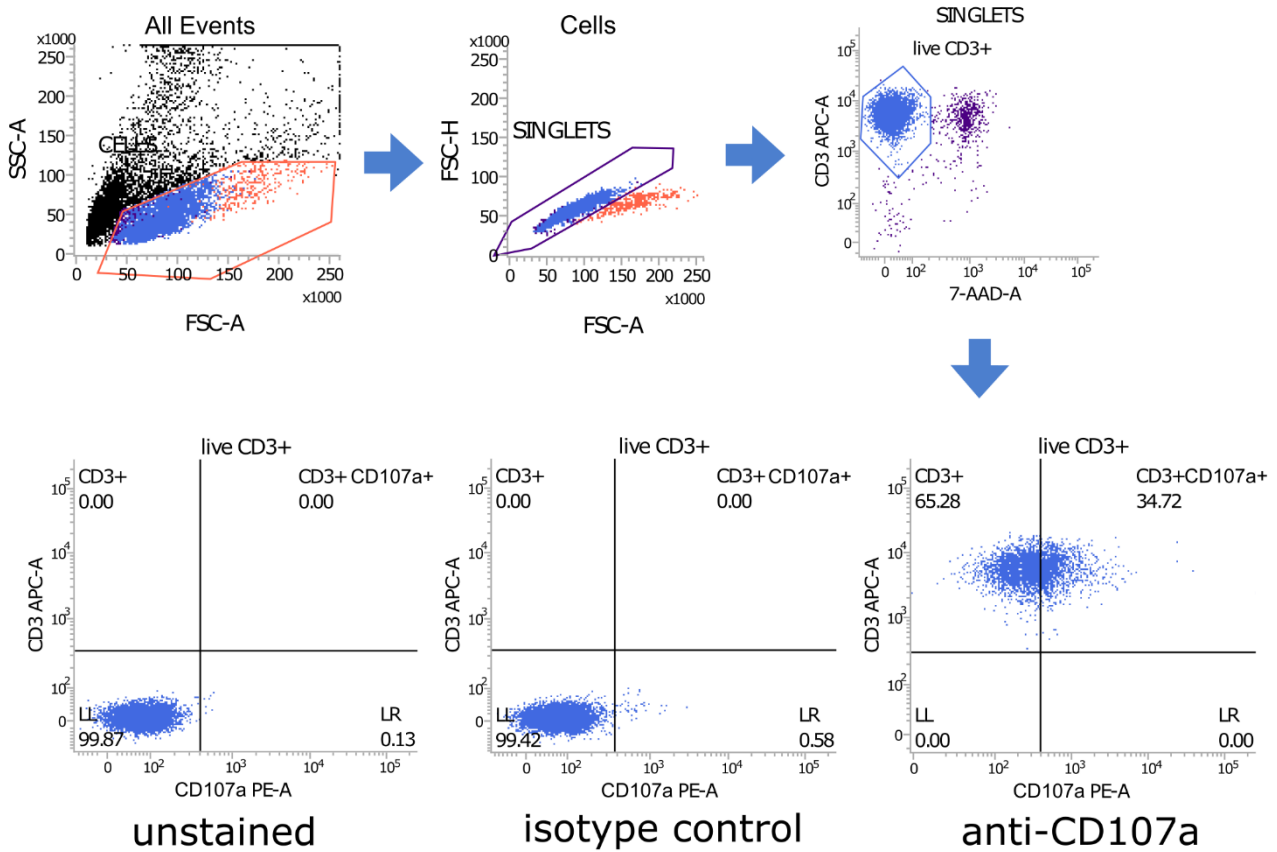

**Supplementary Figure S4.** Sequential gating to identify CD107a-positive lymphocytes. Stained with anti-CD3 APC (317318, Biolegend), anti-CD107a PE (12-1079-42, Thermo Fisher Scientific) and 7AA-D (420403, Biolegend).

**Supplementary Figure S5**

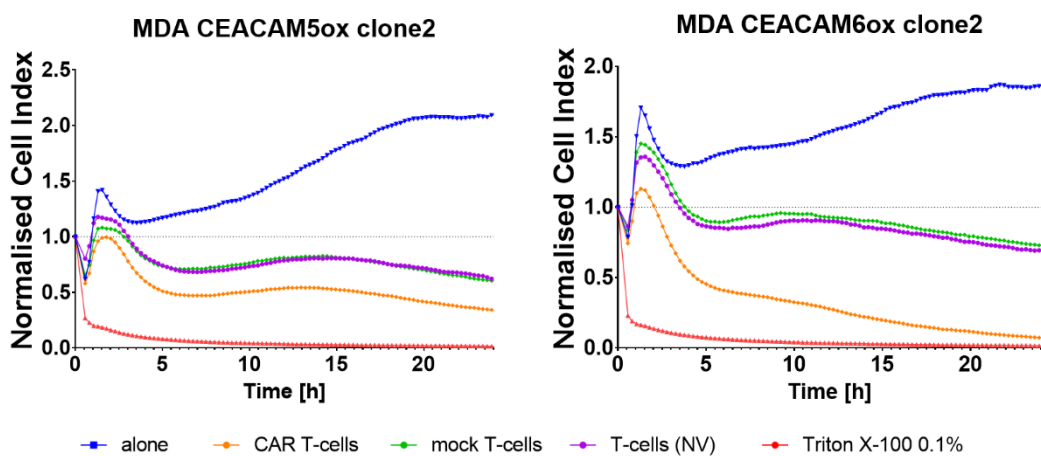

**Supplementary Figure S5.** Cytotoxicity of 2A3-CAR T-cells against MDA-MB-231 cell lines with CEACAM5 or CEACAM6 overexpression – data on additional cell line clones. *Orange line* - anti-2A3-CAR T-cells; *green line* - control mock T-cells; *purple line* - untransduced T-cells (*purple line*); *blue line* – tumor cell line cells without T-cells, *red line* – cytotoxicity positive control, cells treated with 0.1% Triton X-100.
